# Supplementary material for: High Representation of Archaea Across All Depths in Oxic and Low-pH Sediment Layers Underlying an Acidic Stream
Source: Front Microbiol. 2020 Nov 17;11:576520. doi: 10.3389/fmicb.2020.576520 (PMC7716880; doi:10.3389/fmicb.2020.576520)
Supplement: Supplementary file 2 [file Table_1.XLSX]

## Sheet: Carbon-Nitrogen (Leco CN)
Sample number	Layer/Core	Approx. thickness, cm	Depth, cm	Colour of sediment	pH	% moisture	% organic matter	% Carbon	mg C/kg dry sediment	% Nitrogen	mg N/kg dry sediment	C:N ratio
1.1	1.1 Core 1	2	0 to 2	brown	1.7	39.8385	8.20755	0.381215	3.81215	0.01524	0.15945	25.0141
1.2	1.2	2	2 to 4	brown	1.7	42.8451	11.9581	0.359215	3.59215	0.02864	0.29345	12.5424
1.3.1	1.3.1	1	4 to 5	reddish	1.7	41.5596	10.5242	0.160215	1.60215	0.02534	0.26045	6.32261
1.3.2	1.3.2	1	5 to 6	black	1.9	86.3336	5.59123	0.048315	0.48315	0.03553	0.36235	1.35984
1.4	1.4	2	6 to 8	black	2.4	31.5327	5.30513	0.050915	0.50915	0.02175	0.22455	2.34092
2.1	2.1 Core 2	2	0 to 2	brown	1.65	24.5023	2.89314	0.867215	8.67215	0.03251	0.33215	26.6753
2.2	2.2	2	2 to 4	brown	1.65	42.9127	2.88771	0.064015	0.64015	0.06498	0.65685	0.985149
2.3	2.3	2	4 to 6		2.1	45.6477	2.4195	0.692215	6.92215	0.07153	0.72235	9.67727
2.4	2.4	2	6 to 8	black	2.1	46.7778	3.65366	0.213215	2.13215	0.05744	0.58145	3.71196
2.5	2.5	2	8 to 10	black	2.4	42.6615	5.28977	0.030915	0.30915	0.04011	0.40815	0.770755
2.6	2.6	2	10 to 15		2.68	32.4728	8.41823	0.438215	4.38215	0.03932	0.40025	11.1448
3.1	3.1 Core 3	3	0 to 3	brown	2.4	59.0724	12.7655	0.204215	2.04215	0.0445	0.45205	4.5891
3.2	3.2	3	3 to 6	dark red	2.4	52.1934	8.46544	0.153215	1.53215	0.04583	0.46535	3.34312
3.3	3.3	3	6 to 9	dark red+black matter	2.4	48.4807	3.90378	0.052515	0.52515	0.05729	0.57995	0.916652
3.4	3.4	2	9 to 11	black	2.4	44.2219	3.84756	0.049915	0.49915	0.05692	0.57625	0.876933
3.5	3.5	3	13 to 16		2.4	55.592	14.6919	0.267215	2.67215	0.07746	0.78165	3.44972
3.6	3.6	3	19 to 21	black	2.4	44.1083	10.1284	0.711215	7.11215	0.05715	0.57855	12.4447

## Sheet: Anions (IC analysis by CEH)
Sample number							Concentration mg/kg dry sediment
	Layer/Core	Approx. thickness, cm	Depth, cm	Colour of sediment	pH	Fluoride	Chloride	Nitrate	Phosphate	Sulphate	Sulphate (g/kg)
1.1	1.1 Core 1	2	0 to 2	brown	1.7	12.5911	1.25911	125.911	BLD	20400.1	20.4001
1.2	1.2	2	2 to 4	brown	1.7	14.5657	1.45657	145.657	BLD	19103.4	19.1034
1.3.1	1.3.1	1	4 to 5	reddish	1.7	14.3736	1.43736	143.736	BLD	18454.7	18.4547
1.3.2	1.3.2	1	5 to 6	black	1.9	65.3061	6.53061	653.061	BLD	90528.5	90.5285
1.4	1.4	2	6 to 8	black	2.4	9.63964	0.963964	96.3964	BLD	14728.9	14.7289
2.1	2.1 Core 2	2	0 to 2	brown	1.65	12.5169	1.25169	125.169	0.615913	15419.7	15.4197
2.2	2.2	2	2 to 4	brown	1.65	14.5829	1.45829	145.829	BLD	19097.1	19.0971
2.3	2.3	2	4 to 6		2.1	14.2128	1.42128	142.128	BLD	18934.8	18.9348
2.4	2.4	2	6 to 8	black	2.1	17.333	1.7333	173.33	1.00052	18780.2	18.7802
2.5	2.5	2	8 to 10	black	2.4	12.8186	1.28186	128.186	BLD	16597.5	16.5975
2.6	2.6	2	10 to 15		2.68	10.4402	1.04402	104.402	BLD	11835.2	11.8352
3.1	3.1 Core 3	3	0 to 3	brown	2.4	27.8541	2.78541	278.541	BLD	40163	40.163
3.2	3.2	3	3 to 6	dark red	2.4	24.1599	2.41599	241.599	3.16902	31547.5	31.5475
3.3	3.3	3	6 to 9	dark red+black matter	2.4	14.1209	1.41209	141.209	3.45017	20136.2	20.1362
3.4	3.4	2	9 to 11	black	2.4	12.9083	1.29083	129.083	4.10107	15869.1	15.8691
3.5	3.5	3	13 to 16		2.4	24.9955	2.49955	249.955	BLD	25382.3	25.3823
3.6	3.6	3	19 to 21	black	2.4	18.2496	1.82496	182.496	1.71761	22807.9	22.8079
3.7						17.7939	1.77939	177.939	BLD	23778.8	23.7788
				*BLD = below limit of detection

## Sheet: Elemental analysis (TXRF)
Sample Number		Mean concentration of element (mg/kg dried sediment, n=3)
	Layer/Core	Approx. thickness	Depth	Colour of sediment	pH	Al		S		K		Ca		Ti		Cr		Mn		Fe		Ni		Cu		Zn		Ga		As		Br		Rb		Sr		Y		Pb
		(cm)	(cm)			Mean	SEM	Mean	SEM	Mean	SEM	Mean	SEM	Mean	SEM	Mean	SEM	Mean	SEM	Mean	SEM	Mean	SEM	Mean	SEM	Mean	SEM	Mean	SEM	Mean	SEM	Mean	SEM	Mean	SEM	Mean	SEM	Mean	SEM	Mean	SEM
1.1	1.1 Core 1	2	0 to 2	brown	1.7	18964.5	939.863	21857.9	4132.44	17128.4	191.364	610.504	9.24763	2613.37	51.3421	59.5927	7.12328	41.9477	4.7855	140832	2775.4	1.728	0.156767	643.054	19.5109	543.006	9.52867	7.74467	0.611486	3277.01	62.5986	9.245	0.244386	26.4033	1.32329	42.505	0.929154	45.5147	10.2913	4703.11	36.0296
1.2	1.2	2	2 to 4	brown	1.7	25864.4	768.313	10795.3	7236.45	18746.8	381.525	507.078	26.8526	3435.48	139.59	81.5753	17.9619	62.4357	6.19503	162865	5053.29	3.47133	0.753327	681.213	30.683	600.372	113.977	7.56533	0.536058	3727.77	100.28	11.299	0.440641	32.9627	1.5659	43.384	1.54081	25.683	1.95456	4998.97	100.467
1.3.1	1.3.1	1	4 to 5	reddish	1.7	29624.6	569.858	11505.3	7610.39	19757	99.5282	628.193	41.0416	4642.29	150.834	116.274	8.71888	72.53	3.26343	176533	4299.95	23.518	2.44452	608.484	9.76152	352.948	45.1325	5.119	1.0621	4473.67	98.7978	10.6863	0.0747314	38.6527	1.87502	46.4907	2.42141	23.7863	3.08522	4683.36	88.4413
1.3.2	1.3.2	1	5 to 6	black	1.9	64475.4	1195.81	1594.16	29.0143	27481.2	499.131	796.842	17.0552	6934.45	72.9636	231.362	56.819	121.045	2.69875	99915.5	282.69	86.195	0.866073	285.191	3.1068	176.364	4.09224	13.1707	0.778267	2362.92	20.1464	2.91733	0.105975	94.0647	2.62522	46.9787	0.59454	31.9953	3.36987	1707.51	7.71923
1.4	1.4	2	6 to 8	black	2.4	72889.3	856.733	5465.44	175.275	28177	236.518	948.947	14.0588	5853.27	111.421	79.7743	9.44379	79.4283	1.16751	65301.9	1463.5	11.6147	0.429168	303.576	9.51689	187.523	24.0314	17.8643	0.572784	1557.89	25.9704	1.95367	0.0522058	96.2327	1.05533	45.9433	0.848568	30.791	0.583714	1165.17	18.8532
2.1	2.1 Core 2	2	0 to 2	brown	1.65	48042.1	454.335	12797.1	1833.71	23868.8	302.283	473.492	52.6828	5005.1	149.999	185.993	66.1079	71.1413	2.59568	73084.4	822.307	26.7897	0.453059	433.248	20.6924	346.659	33.2948	8.98033	0.414369	2421.5	18.6143	5.88667	0.0407035	72.7693	1.29788	35.6293	2.26016	29.563	1.92699	2255.06	30.7645
2.2	2.2	2	2 to 4	brown	1.65	38372.8	901.524	13223.9	803.105	22723.3	385.72	462.664	10.3008	4566.56	226.3	91.4	6.75101	63.819	0.222007	96150.5	176.263	18.04	0.766022	471.887	34.8368	381.748	63.9144	6.234	0.182895	3827.31	38.3297	8.66833	0.413223	67.0847	1.47759	36.8877	1.96275	20.4597	0.52223	3088.23	31.8264
2.3	2.3	2	4 to 6		2.1	65670.5	1317.74	9018.35	769.054	29213.3	466.396	360.192	16.4167	6537.82	109.315	167.961	61.6861	71.8433	1.86459	59882.2	352.403	22.676	0.20651	270.698	11.9444	210.617	5.68128	12.3477	0.0345704	2174.7	9.53786	2.78033	0.138083	100.132	0.802861	36.337	1.29167	36.824	5.7009	1082.77	5.59324
2.4	2.4	2	6 to 8	black	2.1	68742.6	1736.7	3804.29	51.6761	30198	102.574	333.298	3.44952	7355.66	179.196	72.803	4.27173	62.6463	1.52533	29296.6	379.842	14.0823	0.421548	158.274	1.5585	195.731	19.5167	18.38	0.189466	652.188	15.3067	BLD		127.53	1.6066	38.9583	0.101144	35.071	0.8992	450.408	8.75833
2.5	2.5	2	8 to 10	black	2.4	82944.3	2592.87	4451.85	261.028	30627.5	323.472	1285.64	43.7339	7004.18	220.457	74.4417	7.0633	99.272	0.399853	38295.6	261.251	10.8563	0.724689	491.618	37.9509	342.358	4.76198	18.692	0.208007	636.996	2.26561	BLD		107.473	0.771928	54.1543	0.535374	29.2347	1.48622	429.987	6.68411
2.6	2.6	2	10 to 15		2.68	114395	2741.33	12193.2	103.451	48952.1	499.747	218.465	9.18361	8585.15	199.353	138.314	8.2405	72.0993	4.85451	28019.7	866.743	10.5787	1.74838	1850.08	79.9053	118.512	4.63249	28.0733	0.896472	261.824	11.7431	BLD		177.417	3.77861	29.1083	1.62491	24.573	1.30294	141.191	1.48957
3.1	3.1 Core 3	3	0 to 3	brown	2.4	38991.8	1191.26	706.518	480.33	15897.5	136.444	570.807	16.2646	3370.86	96.6798	44.7867	2.28166	29.6853	1.15407	20998.4	904.313	4.11067	0.774871	708.567	36.608	583.699	16.0442	8.211		108.277	12.7932	5.71167	0.396817	61.1667	1.5948	34.0483	2.39661	32.5627	1.07989	3462.39	605.995
3.2	3.2	3	3 to 6	dark red	2.4	57774.3	2365.22	160.952	15.5132	22169	388.12	1349.03	72.7358	4972.76	88.104	58.7193	1.06461	56.706	0.178972	37407.9	233.454	4.79033	0.377643	436.923	19.2949	571.219	53.525	12.4683	0.22591	377.319	24.1966	5.479	0.148008	77.188	1.01507	46.3527	1.19969	36.663	2.1183	3387.43	186.355
3.3	3.3	3	6 to 9	dark red+black matter	2.4	76265.7	460.147	5841.46	161.54	31811.5	450.217	1255.36	24.407	6698.74	76.6909	72.846	8.65342	66.2233	0.700252	34785.6	596.64	7.14567	2.3165	233.679	7.23921	268.947	50.496	19.8827	0.172974	471.855	7.57534	2.43167	0.172612	109.743	1.09939	52.421	0.694646	40.3353	3.79417	1643.47	83.74
3.4	3.4	2	9 to 11	black	2.4	68930	3283.27	7792.2	765.064	27560.4	799.154	911.439	41.3751	7276.75	267.277	75.9323	6.38196	54.3983	1.64038	24429.5	577.719	6.73233	0.508876	10007.6	32.2541	789.224	35.1358	13.3507	0.463117	961.807	11.778	BLD		101.344	2.13753	44.012	2.55826	33.5757	1.67937	1100.13	54.8233
3.5	3.5	3	13 to 16		2.4	65891.2	619.818	18634.2	215.196	25564.2	383.211	556.952	29.1933	4562.36	263.683	64.134	3.62291	21.031	2.17977	24967	670.607	43.2253	0.52946	3770.93	155.536	5844.89	123.959	26.476	0.997006	839.515	7.13093	10.8557	0.198221	91.174	2.38055	34.1543	0.637135	60.9603	3.09842	8470.3	335.311
3.6	3.6	3	19 to 21	black	2.4	39728.5	934.181	5753.44	152.923	16085	547.639	430.904	34.3906	3066.05	261.156	35.5937	0.341811	14.168	0.410663	27966.7	1489.43	10.2843	1.17846	12227.5	329.539	2258.74	96.377	2.266	0.593703	458.723	5.3367	6.20533	0.410406	58.8233	2.14149	25.6097	1.85862	38.9943	8.91153	3732.82	423.516
3.7						44954.3	690.928	171.215	5.55072	18641	497.649	633.212	32.2843	3591.63	108.631	55.2463	9.52792	31.669	0.374231	54407.6	2015.73	2.985	1.71628	1522.16	29.8185	1154.61	235.751	15.1463	0.314465	556.733	16.7213	6.774	0.628922	67.3257	2.45299	38.8847	2.92034	51.1967	6.38771	4461.11	244.513
			*BLD = below limit of detection
			SEM = standard error of the mean
